# Supplementary material for: Shared mycorrhizae but distinct communities of other root-associated microbes on co-occurring native and invasive maples
Source: PeerJ. 2019 Jul 30;7:e7295. doi: 10.7717/peerj.7295 (PMC6677121; doi:10.7717/peerj.7295)
Supplement: Supplemental Information 2 [file peerj-07-7295-s002.xlsx]

## Sheet: Sheet1
Chemical analyses of the soil collected around the roots of each Norway maple and sugar maple seedling
Species	Sampling date	Numeric Code:	pH	% O.M.	mg Ca/kg	mg P/kg	mg Mg/kg	mg K/kg	C/N ratio	C (%)	N%
Norway	2018-06-25	1	6.34	9.81964	3033.94	6.05543	630.311	89.1155	10.0359	6.3348	0.631215
Norway	2018-06-25	2	5.45	5.70555	1066.03	28.6426	124.976	63.7321	10.2322	3.67641	0.359296
Norway	2018-06-25	3	6.07	7.47826	2415.31	15.5232	204.115	57.7033	9.50271	4.90809	0.516494
Norway	2018-06-25	4	5.54	8.29694	1686.23	12.4834	196.79	63.9042	9.55157	4.68652	0.490655
Norway	2018-06-25	5	5.39	11.1988	2494.77	10.9162	365.6	60.4069	8.8989	6.51649	0.732281
Sugar	2018-06-25	6	6.38	17.8242	4147.71	10.2966	814.453	99.5145	8.97079	11.8877	1.32516
Sugar	2018-06-25	7	5.65	5.32095	1043.06	32.5066	135.215	60	9.2965	3.21144	0.345446
Sugar	2018-06-25	8	5.99	7.23982	2198.64	10.8971	213.823	51.0108	9.14946	4.42776	0.483937
Sugar	2018-06-25	9	5.83	9.47608	2340.48	12.2067	262.08	55.584	9.9688	5.98478	0.600352
Sugar	2018-06-25	10	5.93	13.8346	3557.83	9.57692	551.981	53.9617	9.5677	7.99745	0.835881
Norway	2018-07-11	11	5.27	7.54986	1207.67	36.7933	135.911	55.5911	9.80463	4.64553	0.47381
Norway	2018-07-11	12	6.47	14.6839	4019.5	14.9173	631.594	86.2006	9.053	10.4406	1.15327
Norway	2018-07-11	13	5.58	7.63747	1930.56	16.1487	220.128	68.352	9.44633	4.64545	0.491773
Norway	2018-07-11	14	4.78	8.44812	1164.54	34.1906	128.243	85.9744	8.92206	5.16505	0.578908
Norway	2018-07-11	15	6.26	11.3992	3556.77	11.1742	323.106	72.8263	10.9257	6.54081	0.598662
Sugar	2018-07-11	16	5.69	6.64653	1685.55	20.7546	191.445	32.3703	10.7041	5.25771	0.491187
Sugar	2018-07-11	17	6.06	7.39726	2664.97	8.95088	285.436	55.6716	9.24835	4.69341	0.507486
Sugar	2018-07-11	18	5.42	9.81888	2119.68	17.2303	234.528	81.024	9.78188	7.0555	0.721283
Sugar	2018-07-11	19	4.96	7.75638	1249.88	15.4236	140.24	66.283	8.89722	4.92249	0.553262
Sugar	2018-07-11	20	6.01	7.6555	2649.5	9.11807	327.901	56.8093	9.83197	5.88287	0.598341
Norway	2018-07-27	21	4.89	6.94311	1146.33	12.6107	160.351	89.9042	9.17012	4.50728	0.491518
Norway	2018-07-27	22	5.27	6.37695	1165.03	26.3957	162.299	54.7066	11.1115	4.93774	0.444382
Norway	2018-07-27	23	5.19	10.1118	1883.93	15.7548	184.077	72.6139	9.43751	6.36072	0.673983
Norway	2018-07-27	24	5.68	7.74963	2119.39	11.0421	232.338	78.8188	9.92888	4.60179	0.463475
Norway	2018-07-27	25	6.09	8.91544	2640.67	6.29852	390.227	64.4648	9.95964	5.08602	0.510662
Sugar	2018-07-27	26	5.26	9.9162	2074.25	14.1892	325.844	95.0419	8.1849	6.12715	0.748591
Sugar	2018-07-27	27	5.28	6.02141	1311.8	25.3897	159.008	55.7537	10.0749	3.85343	0.382479
Sugar	2018-07-27	28	5.24	10.3734	2198.33	16.861	216.965	69.773	8.33767	7.9306	0.951177
Sugar	2018-07-27	29	5.59	8.10542	1869.33	27.9269	195.282	142.791	11.1627	5.83121	0.522384
Sugar	2018-07-27	30	5.83	8.12562	2350.28	5.13282	356.271	59.6653	9.14112	5.38511	0.589108
Norway	2018-08-12	31	5.67	8.48612	2097.25	13.3755	224.862	68.503	10.0313	6.88883	0.686732
Norway	2018-08-12	32	5.38	11.1004	1923.83	16.9187	258.874	84.2156	9.78165	7.8038	0.7978
Norway	2018-08-12	33	5.47	6.50624	1657.19	9.38264	176.55	48.6901	10.016	3.60108	0.359533
Norway	2018-08-12	34	5.99	9.9538	2932.91	6.73077	311.981	60.6709	8.86032	6.27893	0.708657
Norway	2018-08-12	35	4.89	6.07386	1007.35	6.21545	225.911	60	8.95135	3.19823	0.35729
Sugar	2018-08-12	36	5.86	7.50777	2160.38	11.1337	238.083	59.3291	10.7639	4.95137	0.459998
Sugar	2018-08-12	37	5.42	8.14125	1649.88	21.4897	184.365	70.1199	9.53193	4.42843	0.464589
Sugar	2018-08-12	38	5.66	8.57843	1935.36	8.52328	209.664	50.304	10.6102	5.27366	0.497036
Sugar	2018-08-12	39	6.13	9.10789	3258.3	6.78692	354.695	61.0753	9.4848	6.00001	0.632592
Sugar	2018-08-12	40	5.2	7.6326	1831.91	6.99393	306.214	82.0472	9.06856	4.83519	0.533182
Norway	2018-08-28	41	5.76	8.23471	2054.82	15.8122	220.876	48.7649	10.1099	4.72608	0.467472
Norway	2018-08-28	42	5.64	11.8357	2736.69	7.58226	326.906	64.0767	9.65503	7.26105	0.752048
Norway	2018-08-28	43	5.44	6.76617	1551.87	10.0873	203.857	62.3426	10.9862	3.95663	0.360147
Norway	2018-08-28	44	6.1	10.1322	3162.94	6.50185	337.764	64.3131	9.813	6.06332	0.617887
Norway	2018-08-28	45	5.84	12.6509	3104.59	8.86677	495.221	61.8428	9.94604	6.64467	0.668072
Sugar	2018-08-28	46	5.86	6.68342	1888.32	23.0463	174.336	49.92	10.0781	4.59668	0.456107
Sugar	2018-08-28	47	5.51	9.65547	2399.04	7.98891	281.597	58.5623	11.2672	7.12107	0.632015
Sugar	2018-08-28	48	5.27	7.00095	1544.09	12.4463	232.045	62.2045	10.0432	4.14541	0.412758
Sugar	2018-08-28	49	6.07	11.5385	3530.43	7.90731	338.553	64.1983	10.1529	7.8937	0.777486
Sugar	2018-08-28	50	5.11	8.78896	2044.98	7.41591	298.278	59.5215	9.57562	6.15211	0.642477
Norway	2018-09-13	51	5.97	5.48148	1680	37.9059	154.272	44.64	10.5203	4.07537	0.38738
Norway	2018-09-13	52	5.7	8.51064	2258.37	10.7795	241.722	54.067	7.71265	6.50801	0.843809
Norway	2018-09-13	53	5.76	9.897	2623.14	8.59313	369.29	73.9346	10.4697	6.6027	0.630646
Norway	2018-09-13	54	6.27	10.9627	3461.78	6.10975	637.832	114.978	10.0828	6.96902	0.691176
Norway	2018-09-13	55	5.2	7.55973	1589.46	6.5908	320.862	70.8024	9.94004	5.72803	0.576258
Sugar	2018-09-13	56	6.07	6.35417	2191.3	39.1822	215.588	46.9087	11.1846	4.78504	0.427825
Sugar	2018-09-13	57	5.84	9.10448	2632.26	12.0009	270.872	66.3321	9.83017	6.16467	0.627117
Sugar	2018-09-13	58	5.51	8.37989	2208.38	7.14854	286.563	64	9.92718	6.36188	0.640855
Sugar	2018-09-13	59	6.61	10.9756	3989.76	6.00883	756.384	88.224	7.16664	6.91254	0.964543
Sugar	2018-09-13	60	4.89	8.27206	1595.2	6.34408	291.894	61.5827	9.28503	5.99836	0.646025
Norway	2018-09-29	61	5.65	9.81834	2501.39	9.21536	335.464	74.6114	10.0277	6.84056	0.682168
Norway	2018-09-29	62	5.56	9.17389	1923.45	8.7164	269.916	70.6672	11.2119	5.77768	0.515318
Norway	2018-09-29	63	5.41	7.63652	1605.12	6.78629	243.744	61.344	6.55633	4.53071	0.691044
Norway	2018-09-29	64	5.84	9.45378	2473.63	9.94579	260.462	71.5219	7.60995	6.69389	0.879624
Norway	2018-09-29	65	6.1	8.43531	2487.15	5.73863	499.25	93.3759	9.48255	4.97963	0.525137
Sugar	2018-09-29	66	5.3	10.5237	2380.87	10.682	253.009	65.3328	10.5509	7.27721	0.689721
Sugar	2018-09-29	67	5.74	8.20173	2158.28	14.6981	291.115	74.1401	10.7887	4.95612	0.459382
Sugar	2018-09-29	68	5.17	5.98903	1278.72	8.73362	151.968	61.056	7.16925	4.01065	0.559424
Sugar	2018-09-29	69	5.82	7.52114	2378.03	13.71	187.261	68.5032	7.36421	5.12103	0.695395
Sugar	2018-09-29	70	6.04	7.7527	2561.85	5.33083	458.164	86.4804	9.6218	4.75036	0.493708
Norway	2018-10-15	71	5.98	7.19523	2037.41	15.7169	261.966	59.6643	7.42335	3.64711	0.491303
Norway	2018-10-15	72	5.39	8.16523	1534.08	12.4039	199.488	66.72	9.83388	5.29545	0.538491
Norway	2018-10-15	73	5.5	11.5633	3049.92	11.9017	326.016	80.736	8.22934	7.36327	0.894758
Norway	2018-10-15	74	4.7	9.49525	1144.91	9.31819	165.365	75.1138	6.65166	5.83318	0.87695
Norway	2018-10-15	75	6.16	10.0244	2962.56	6.77134	416.736	69.984	7.70219	6.55156	0.85061
Sugar	2018-10-15	76	5.77	8.19113	2034.68	26.234	187.359	62.2293	10.7544	4.87977	0.453745
Sugar	2018-10-15	77	5.79	8.50048	2120.24	22.2942	226.395	66.1078	10.11	5.57073	0.551012
Sugar	2018-10-15	78	4.78	12.0584	1503.12	21.6086	183.213	68.4892	9.6043	7.1228	0.741627
Sugar	2018-10-15	79	4.92	8.39014	1329.07	6.47891	173.499	63.8145	9.58355	4.61264	0.481309
Sugar	2018-10-15	80	6.15	10.0515	2990.2	6.68329	391.136	79.2985	10.1217	6.03892	0.596633
Chemical analysis of soil
Soil chemical analyses were performed on soil collected around the roots of each seedling. The soil chemical analyses were performed at the Nutrient Analysis laboratory in the Natural Resources Department at McGill University (Montreal, Qc).
The air-dried soil samples were sieved through a 2-mm mesh and homogenized prior to analyses. Soil pH was measured in a 1:1 or 1:2 soil/water suspension (pH meter Accumet AR10 model, Thermo-Fisher, USA).
Percent organic matter was determined using the Loss on Ignition method based on Schulte et al. (1991).
Total carbon (C) and total nitrogen (N) (both obtained after dry combustion at 900°C) were determined using a ThermoFinnigan Flash EA 1112 CN analyzer (Carlo Erba, Milan, Italy).
Available phosphorus (P), potassium (K), calcium (Ca) and magnesium (Mg) were extracted using Mehlich III solution (Ziadi and Sen Tran 2008).
Phosphorus (P) was measured at 800nm on a Flow Injection Analyzer (Lachat Instruments, Milwaukee, USA), and cations (Ca, Mg, K) were measured on a Varian 220FS flame atomic absorption spectrophotometer.
Schulte, E.E., Kaufmann, C., Peters, J.B. (1991) The influence of sample size and heating time on soil weight loss-on-ignition. Comm. Soil Science and Plant Analysis 22: 159-168.
Ziadi, N., and Sen Tran, T. 2008. Mehlich 3-extractable phosphorus. In Carter, M.R., and E.G. Gregorich (eds). Soil Sampling and Methods of Analysis. 2nd ed. Canadian Society of Soil Science, CRC Press and Taylor & Francis Group. Oxford, UK.
